# Supplementary material
Source: MDPI journal article supplement (https://www.mdpi.com/1999-4907/13/7/1100)

**Figure S3. Cross-validation error in the admixture analysis.** The x-axis represents K values and the y-axis represents the corresponding cross-validation error. The cross-validation error was lowest at K = 2.

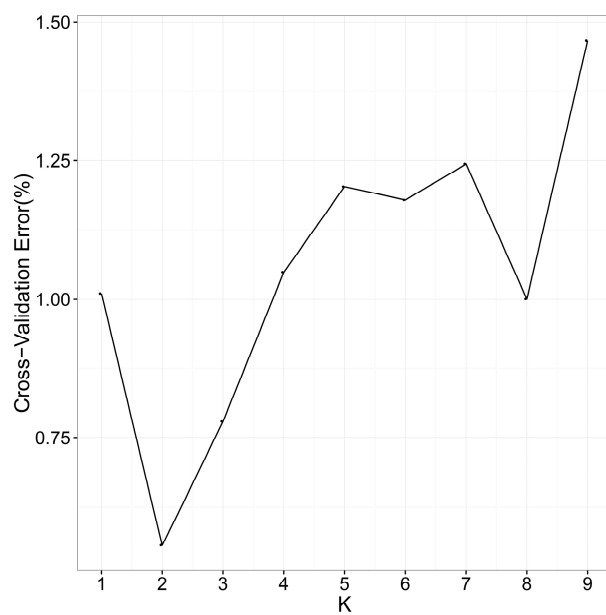

**Figure S4. Admixture plot (a-h: K=2-9) for 21 pinewood nematode samples. Each color represents one ancestral population.**

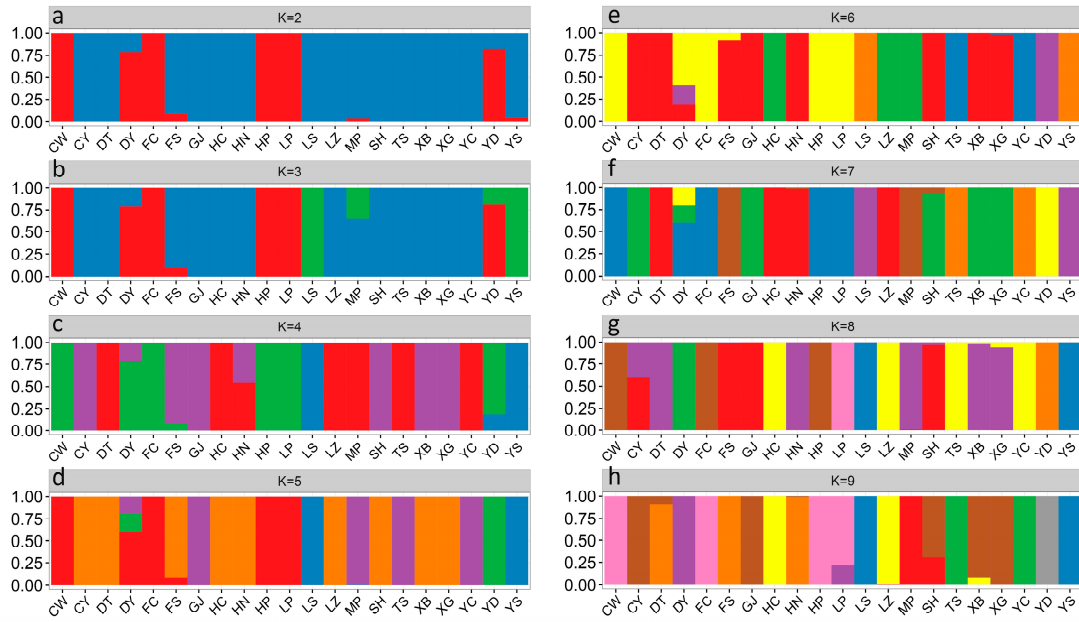

Supplement: s1 [file s1]
