# Supplementary material
Source: MDPI journal article supplement (https://www.mdpi.com/1999-4907/13/7/1100)
Supplement: s1 [file s1]

**Table S17. InDel location summary of 21 pinewood nematode samples.**

| Sample | downstream | exonic | intergenic | intronic | splicing | upstream | UTR5 |
|--------|------------|--------|------------|----------|----------|----------|------|
| CW     | 3824       | 679    | 13323      | 14837    | 58       | 4663     | NA   |
| CY     | 4590       | 904    | 15226      | 18006    | 71       | 5742     | 1    |
| DT     | 4575       | 892    | 15183      | 17855    | 72       | 5718     | 1    |
| DY     | 5729       | 1050   | 19586      | 22245    | 85       | 7096     | 1    |
| FC     | 3809       | 697    | 13231      | 14703    | 60       | 4659     | NA   |
| FS     | 4639       | 910    | 15298      | 18079    | 71       | 5775     | 1    |
| GJ     | 4633       | 915    | 15335      | 18105    | 72       | 5775     | 1    |
| HC     | 4640       | 907    | 15347      | 18146    | 73       | 5776     | 1    |
| HN     | 4599       | 881    | 15252      | 17990    | 72       | 5741     | 1    |
| HP     | 3842       | 684    | 13383      | 14928    | 59       | 4702     | NA   |
| LP     | 4255       | 779    | 14761      | 16716    | 66       | 5194     | 1    |

---

|    |      |      |       |       |     |      |   |
|----|------|------|-------|-------|-----|------|---|
| LS | 4625 | 921  | 15459 | 18210 | 70  | 5788 | 1 |
| LZ | 4593 | 905  | 15211 | 17939 | 72  | 5724 | 1 |
| MP | 4665 | 917  | 15497 | 18268 | 73  | 5815 | 1 |
| SH | 4573 | 898  | 15243 | 17953 | 71  | 5728 | 1 |
| TS | 4642 | 896  | 15385 | 18198 | 72  | 5813 | 1 |
| XB | 4610 | 884  | 15289 | 18091 | 72  | 5765 | 1 |
| XG | 4572 | 893  | 15159 | 17802 | 72  | 5694 | 1 |
| YC | 4602 | 890  | 15237 | 18030 | 73  | 5742 | 1 |
| YD | 6346 | 1152 | 20170 | 24488 | 111 | 7883 | 1 |
| YS | 4658 | 915  | 15505 | 18259 | 72  | 5787 | 1 |

---

**Table S18. InDel function summary of 21 pinewood nematode samples.**

| Sample | frameshift deletion | frameshift insertion | nonframeshift deletion | nonframeshift insertion | stopgain | stoploss | unknown |
|--------|---------------------|----------------------|------------------------|-------------------------|----------|----------|---------|
| CW     | 220                 | 131                  | 188                    | 122                     | 10       | 5        | 3       |
| CY     | 248                 | 189                  | 271                    | 176                     | 13       | 5        | 2       |
| DT     | 239                 | 187                  | 269                    | 178                     | 13       | 5        | 1       |
| DY     | 314                 | 202                  | 313                    | 195                     | 16       | 6        | 4       |
| FC     | 233                 | 133                  | 190                    | 123                     | 11       | 4        | 3       |
| FS     | 257                 | 187                  | 269                    | 176                     | 14       | 6        | 1       |
| GJ     | 257                 | 190                  | 272                    | 176                     | 13       | 5        | 2       |
| HC     | 255                 | 188                  | 269                    | 175                     | 13       | 5        | 2       |
| HN     | 235                 | 182                  | 268                    | 176                     | 13       | 5        | 2       |
| HP     | 229                 | 133                  | 184                    | 121                     | 10       | 4        | 3       |
| LP     | 252                 | 144                  | 223                    | 140                     | 13       | 4        | 3       |

---

|    |     |     |     |     |    |    |   |
|----|-----|-----|-----|-----|----|----|---|
| LS | 255 | 191 | 276 | 178 | 14 | 5  | 2 |
| LZ | 254 | 190 | 266 | 176 | 13 | 5  | 1 |
| MP | 258 | 190 | 272 | 178 | 13 | 5  | 1 |
| SH | 253 | 182 | 270 | 174 | 13 | 5  | 1 |
| TS | 248 | 185 | 267 | 176 | 13 | 5  | 2 |
| XB | 238 | 181 | 270 | 176 | 13 | 5  | 1 |
| XG | 245 | 182 | 271 | 175 | 13 | 5  | 2 |
| YC | 245 | 183 | 266 | 176 | 13 | 5  | 2 |
| YD | 337 | 217 | 341 | 224 | 16 | 10 | 7 |
| YS | 256 | 188 | 273 | 176 | 15 | 5  | 2 |

---

**Table S19. InDel homozygosity and heterozygosity summary of 21 pinewood nematode samples.**

| Sample | Homozygosity | Heterozygosity |
|--------|--------------|----------------|
| CW     | 37583        | 1626           |
| CY     | 45075        | 1730           |
| DT     | 44776        | 1778           |
| DY     | 27688        | 30930          |
| FC     | 37165        | 1850           |
| FS     | 43972        | 3123           |
| GJ     | 45363        | 1769           |
| HC     | 45348        | 1827           |
| HN     | 45014        | 1772           |
| HP     | 37651        | 1791           |
| LP     | 34615        | 9255           |

---

|    |       |       |
|----|-------|-------|
| LS | 45417 | 1950  |
| LZ | 44849 | 1886  |
| MP | 44649 | 2891  |
| SH | 44968 | 1777  |
| TS | 45545 | 1741  |
| XB | 45285 | 1693  |
| XG | 44813 | 1653  |
| YC | 45144 | 1694  |
| YD | 30715 | 32755 |
| YS | 44327 | 3185  |

---
