# Supplementary material
Source: MDPI journal article supplement (https://www.mdpi.com/1999-4907/13/7/1100)
Supplement: s1 [file s1]

**Table S5. Reads statistics of 21 pinewood nematode samples.** HQ, high quality; Adapter, number of reads with adapter in clean reads; Low quality, number of reads containing low quality bases to a certain extent; polyA, number of reads containing poly adenine to a certain extent; N, number of reads containing poly adenine to a certain extent.

| Sample | Clean Reads Number | HQ Clean Reads Number (%) | Read length | Adapter (%)  | Low quality (%) | polyA (%) | N (%)    |
|--------|--------------------|---------------------------|-------------|--------------|-----------------|-----------|----------|
| CW     | 16036586           | 15854138(98.86%)          | 150 + 150   | 53828(0.34%) | 257240(0.8%)    | 0(0.0%)   | 0(0.0%)  |
| CY     | 12367170           | 12210040(98.73%)          | 150 + 150   | 45040(0.36%) | 224180(0.91%)   | 0(0.0%)   | 0(0.0%)  |
| DT     | 16301008           | 16107830(98.81%)          | 150 + 150   | 45492(0.28%) | 295372(0.91%)   | 0(0.0%)   | 0(0.0%)  |
| DY     | 15996108           | 15686412(98.06%)          | 150 + 150   | 63926(0.4%)  | 491540(1.54%)   | 0(0.0%)   | 0(0.0%)  |
| FC     | 15542646           | 15371656(98.9%)           | 150 + 150   | 44068(0.28%) | 253844(0.82%)   | 0(0.0%)   | 0(0.0%)  |
| FS     | 14608468           | 14380726(98.44%)          | 150 + 150   | 50086(0.34%) | 355312(1.22%)   | 0(0.0%)   | 0(0.0%)  |
| GJ     | 18082484           | 17869446(98.82%)          | 150 + 150   | 57646(0.32%) | 310764(0.86%)   | 0(0.0%)   | 20(0.0%) |
| HC     | 16321712           | 16101682(98.65%)          | 150 + 150   | 55822(0.34%) | 328416(1.01%)   | 0(0.0%)   | 0(0.0%)  |
| HN     | 16844416           | 16603740(98.57%)          | 150 + 150   | 47968(0.28%) | 385416(1.14%)   | 0(0.0%)   | 0(0.0%)  |

|    |          |                  |           |              |               |         |         |
|----|----------|------------------|-----------|--------------|---------------|---------|---------|
| HP | 17336402 | 17078962(98.52%) | 150 + 150 | 65242(0.38%) | 384396(1.11%) | 0(0.0%) | 0(0.0%) |
| LP | 12862122 | 12675306(98.55%) | 150 + 150 | 47610(0.37%) | 278412(1.08%) | 0(0.0%) | 0(0.0%) |
| LS | 17986750 | 17760654(98.74%) | 150 + 150 | 54728(0.3%)  | 342728(0.95%) | 0(0.0%) | 8(0.0%) |
| LZ | 13800412 | 13592284(98.49%) | 150 + 150 | 43078(0.31%) | 330100(1.2%)  | 0(0.0%) | 0(0.0%) |
| MP | 16124822 | 15865180(98.39%) | 150 + 150 | 52730(0.33%) | 413824(1.28%) | 0(0.0%) | 0(0.0%) |
| SH | 12689430 | 12485782(98.4%)  | 150 + 150 | 46596(0.37%) | 314104(1.24%) | 0(0.0%) | 0(0.0%) |
| TS | 18702122 | 18473694(98.78%) | 150 + 150 | 57796(0.31%) | 341264(0.91%) | 0(0.0%) | 0(0.0%) |
| XB | 15066690 | 14870464(98.7%)  | 150 + 150 | 41448(0.28%) | 309556(1.03%) | 0(0.0%) | 0(0.0%) |
| XG | 16731120 | 16541936(98.87%) | 150 + 150 | 42390(0.25%) | 293584(0.88%) | 0(0.0%) | 4(0.0%) |
| YC | 12685392 | 12545030(98.89%) | 150 + 150 | 42924(0.34%) | 194876(0.77%) | 0(0.0%) | 0(0.0%) |
| YD | 14324352 | 14118206(98.56%) | 150 + 150 | 54416(0.38%) | 303460(1.06%) | 0(0.0%) | 0(0.0%) |
| YS | 13499744 | 13321304(98.68%) | 150 + 150 | 47774(0.35%) | 261332(0.97%) | 0(0.0%) | 0(0.0%) |

**Table S6. Base statistics after filtration.** Clean data, number of bases; HQ clean data, number of bases after filtration; HQ Q20, number of bases with quality value above Q20 in filtered HQ clean data; HQ Q30, number of bases with quality value above Q30 in filtered HQ clean data; HQ N, number of N bases in single ended reads in filtered HQ clean data; HQ GC, number of bases containing guanine and cytosine a in filtered HQ clean data.

| Sample | Clean Data(bp) | HQ Clean Data (bp) | HQ Q20 (%)         | HQ Q30 (%)         | HQ N (%)   | HQ GC (%)          |
|--------|----------------|--------------------|--------------------|--------------------|------------|--------------------|
| CW     | 2405487900     | 2357955048         | 2263664387 (96.0%) | 2118742600(89.86%) | 5068(0.0%) | 952857885(40.41%)  |
| CY     | 1855075500     | 1815796146         | 1741171388(95.89%) | 1628722308(89.7%)  | 3880(0.0%) | 747068747(41.14%)  |
| DT     | 2445151200     | 2401161020         | 2333095197(97.17%) | 2213733729(92.19%) | 3134(0.0%) | 1059000698(44.1%)  |
| DY     | 2399416200     | 2330310084         | 2243534662(96.28%) | 2107705911(90.45%) | 5096(0.0%) | 947701123(40.67%)  |
| FC     | 2331396900     | 2271662586         | 2193350804(96.55%) | 2066337030(90.96%) | 4855(0.0%) | 936615134(41.23%)  |
| FS     | 2191270200     | 2124914326         | 2050909500(96.52%) | 1931819709(90.91%) | 4634(0.0%) | 859587357(40.46%)  |
| GJ     | 2712372600     | 2659899727         | 2568920538(96.58%) | 2421476001(91.04%) | 7752(0.0%) | 1132264642(42.57%) |
| HC     | 2448256800     | 2395737956         | 2304114465(96.18%) | 2161911047(90.24%) | 5192(0.0%) | 996571682(41.6%)   |
| HN     | 2526662400     | 2474449203         | 2390123572(96.59%) | 2253560413(91.07%) | 7299(0.0%) | 1120931784(45.3%)  |

---

|    |            |            |                    |                    |            |                    |
|----|------------|------------|--------------------|--------------------|------------|--------------------|
| HP | 2600460300 | 2539330615 | 2441219339(96.14%) | 2289911650(90.18%) | 5595(0.0%) | 1011322420(39.83%) |
| LP | 1929318300 | 1886173730 | 1810854894(96.01%) | 1695638570(89.9%)  | 4096(0.0%) | 778478786(41.28%)  |
| LS | 2698012500 | 2645227813 | 2550626707(96.42%) | 2400008800(90.73%) | 7740(0.0%) | 1090333767(41.22%) |
| LZ | 2070061800 | 2011862721 | 1940093058(96.43%) | 1824841913(90.7%)  | 4475(0.0%) | 793119890(39.42%)  |
| MP | 2418723300 | 2357481106 | 2276601684(96.57%) | 2145582368(91.01%) | 5221(0.0%) | 930151511(39.46%)  |
| SH | 1903414500 | 1858174309 | 1784019124(96.01%) | 1671039091(89.93%) | 4089(0.0%) | 778023609(41.87%)  |
| TS | 2805318300 | 2752616869 | 2660325552(96.65%) | 2508868505(91.14%) | 3800(0.0%) | 1100565025(39.98%) |
| XB | 2260003500 | 2217134124 | 2142490749(96.63%) | 2020080458(91.11%) | 3353(0.0%) | 904005727(40.78%)  |
| XG | 2509668000 | 2466690843 | 2383465966(96.63%) | 2246495303(91.07%) | 6869(0.0%) | 1179639619(47.82%) |
| YC | 1902808800 | 1866371556 | 1788390944(95.82%) | 1670739336(89.52%) | 3975(0.0%) | 763846866(40.93%)  |
| YD | 2148652800 | 2099836947 | 2014250188(95.92%) | 1884770434(89.76%) | 4641(0.0%) | 859786300(40.94%)  |
| YS | 2024961600 | 1982267130 | 1903153733(96.01%) | 1782324303(89.91%) | 4339(0.0%) | 807694571(40.74%)  |

---

Table S7. Mapping statistics of 21 pinewood nematode samples.

| Sample | Total    | Total UnMapped | Total Mapped    | Total Pair      | Total Single  | Unique Mapped   | Multi-Mapped  | Perfect Mapped  | Mismatch       | Clean           | Duplicate          |
|--------|----------|----------------|-----------------|-----------------|---------------|-----------------|---------------|-----------------|----------------|-----------------|--------------------|
| ID     | Read     |                |                 | Mapped          | Mapped        |                 |               |                 | Mapped         |                 |                    |
| CW     | 15854138 | 849275-5.36%   | 15004863-94.64% | 13952632-88.01% | 1052231-6.64% | 13723945-86.56% | 1280918-8.08% | 12077763-76.18% | 2927100-18.46% | 12056017-76.04% | 1275480-8.50%      |
| CY     | 12210040 | 940297-7.70%   | 11269743-92.30% | 10269786-84.11% | 999957-8.19%  | 10406356-85.23% | 863387-7.07%  | 8715649-71.38%  | 2554094-20.92% | 8967145-73.44%  | 905926-8.04%       |
| DT     | 16107830 | 3148118-19.54% | 12959712-80.46% | 12146708-75.41% | 813004-5.05%  | 11970858-74.32% | 988854-6.14%  | 10219664-63.45% | 2740048-17.01% | 10549465-65.49% | 1687580-<br>13.02% |
| DY     | 15686412 | 1589782-10.13% | 14096630-89.87% | 13456116-85.78% | 640514-4.08%  | 12967663-82.67% | 1128967-7.20% | 11150986-71.09% | 2945644-18.78% | 11225375-71.56% | 1485090-<br>10.54% |
| FC     | 15371656 | 1294215-8.42%  | 14077441-91.58% | 13639598-88.73% | 437843-2.85%  | 12919000-84.04% | 1158441-7.54% | 11513466-74.90% | 2563975-16.68% | 11442761-74.44% | 1488920-<br>10.58% |
| FS     | 14380726 | 1445206-10.05% | 12935520-89.95% | 12457678-86.63% | 477842-3.32%  | 11958707-83.16% | 976813-6.79%  | 10160947-70.66% | 2774573-19.29% | 10404143-72.35% | 1286958-9.95%      |

|    |          |                |                 |                 |               |                 |               |                 |                |                 |                        |
|----|----------|----------------|-----------------|-----------------|---------------|-----------------|---------------|-----------------|----------------|-----------------|------------------------|
| GJ | 17869446 | 2356144-13.19% | 15513302-86.81% | 14260404-79.80% | 1252898-7.01% | 14276168-79.89% | 1237134-6.92% | 12051945-67.44% | 3461357-19.37% | 12362489-69.18% | 1721636-<br><br>11.10% |
| HC | 16101682 | 1680115-10.43% | 14421567-89.57% | 13318106-82.71% | 1103461-6.85% | 13281996-82.49% | 1139571-7.08% | 11192191-69.51% | 3229376-20.06% | 11457502-71.16% | 1335074-9.26%          |
| HN | 16603740 | 4916961-29.61% | 11686779-70.39% | 11010766-66.31% | 676013-4.07%  | 10791233-64.99% | 895546-5.39%  | 9100776-54.81%  | 2586003-15.57% | 9363094-56.39%  | 1235500-<br><br>10.57% |
| HP | 17078962 | 781489-4.58%   | 16297473-95.42% | 15503970-90.78% | 793503-4.65%  | 14910262-87.30% | 1387211-8.12% | 13114130-76.79% | 3183343-18.64% | 13037672-76.34% | 1541478-9.46%          |
| LP | 12675306 | 1155604-9.12%  | 11519702-90.88% | 10761346-84.90% | 758356-5.98%  | 10610966-83.71% | 908736-7.17%  | 9217941-72.72%  | 2301761-18.16% | 9270753-73.14%  | 1015144-8.81%          |
| LS | 17760654 | 2000187-11.26% | 15760467-88.74% | 14812532-83.40% | 947935-5.34%  | 14473816-81.49% | 1286651-7.24% | 12280738-69.15% | 3479729-19.59% | 12578584-70.82% | 1735910-<br><br>11.01% |
| LZ | 13592284 | 473440-3.48%   | 13118844-96.52% | 12632572-92.94% | 486272-3.58%  | 12124910-89.20% | 993934-7.31%  | 10340321-76.07% | 2778523-20.44% | 10645263-78.32% | 1251670-9.54%          |
| MP | 15865180 | 679186-4.28%   | 15185994-95.72% | 14079266-88.74% | 1106728-6.98% | 13987421-88.16% | 1198573-7.55% | 11765108-74.16% | 3420886-21.56% | 12049999-75.95% | 1444338-9.51%          |
| SH | 12485782 | 1770793-14.18% | 10714989-85.82% | 10093212-80.84% | 621777-4.98%  | 9888468-79.20%  | 826521-6.62%  | 8298439-66.46%  | 2416550-19.35% | 8498055-68.06%  | 960666-8.97%           |

|    |          |                |                 |                 |               |                 |               |                 |                |                 |                        |
|----|----------|----------------|-----------------|-----------------|---------------|-----------------|---------------|-----------------|----------------|-----------------|------------------------|
| TS | 18473694 | 1160914-6.28%  | 17312780-93.72% | 16303844-88.25% | 1008936-5.46% | 15973590-86.47% | 1339190-7.25% | 13474337-72.94% | 3838443-20.78% | 13945726-75.49% | 2354208-<br><br>13.60% |
| XB | 14870464 | 1042472-7.01%  | 13827992-92.99% | 13008890-87.48% | 819102-5.51%  | 12752536-85.76% | 1075456-7.23% | 10814698-72.73% | 3013294-20.26% | 11166822-75.09% | 1829602-<br><br>13.23% |
| XG | 16541936 | 5952678-35.99% | 10589258-64.01% | 9729934-58.82%  | 859324-5.19%  | 9588408-57.96%  | 1000850-6.05% | 8260547-49.94%  | 2328711-14.08% | 8347595-50.46%  | 1115870-<br><br>10.54% |
| YC | 12545030 | 825587-6.58%   | 11719443-93.42% | 11016254-87.81% | 703189-5.61%  | 10798173-86.08% | 921270-7.34%  | 9137949-72.84%  | 2581494-20.58% | 9355589-74.58%  | 1024216-8.74%          |
| YD | 14118206 | 1203357-8.52%  | 12914849-91.48% | 12012162-85.08% | 902687-6.39%  | 11842685-83.88% | 1072164-7.59% | 9841048-69.70%  | 3073801-21.77% | 10060596-71.26% | 1136892-8.80%          |
| YS | 13321304 | 925761-6.95%   | 12395543-93.05% | 11542782-86.65% | 852761-6.40%  | 11378529-85.42% | 1017014-7.63% | 9618794-72.21%  | 2776749-20.84% | 9813584-73.67%  | 1068390-8.62%          |

**Table S8. Genome coverage statistics of 21 pinewood nematode samples.**

| Sample_ID | 1X(%) | 4X(%) | 10X(%) | 20X(%) | 30X(%) |
|-----------|-------|-------|--------|--------|--------|
| CW        | 95.35 | 93.28 | 90.75  | 79.79  | 39.73  |
| CY        | 94.39 | 91.68 | 87.54  | 55.92  | 12.19  |
| DT        | 94.3  | 91.59 | 87.75  | 67.73  | 26.9   |
| DY        | 96.49 | 94.3  | 89.99  | 69.87  | 32.62  |
| FC        | 95    | 92.74 | 89.23  | 70.84  | 33.08  |
| FS        | 94.43 | 91.54 | 86.59  | 62.53  | 26.81  |
| GJ        | 94.74 | 92.43 | 89.77  | 80.51  | 44.81  |
| HC        | 94.61 | 92.19 | 89.33  | 76.5   | 35.62  |
| HN        | 94.23 | 91.62 | 87.8   | 59.47  | 15.2   |
| HP        | 95.43 | 93.42 | 90.99  | 81.81  | 49.4   |

|    |       |       |       |       |       |
|----|-------|-------|-------|-------|-------|
| LP | 95.48 | 93.07 | 88.64 | 56.97 | 13.92 |
| LS | 94.64 | 92.26 | 89.65 | 80.61 | 47.2  |
| LZ | 94.06 | 91.39 | 86.91 | 64.98 | 28.72 |
| MP | 94.78 | 92.22 | 89.1  | 75.26 | 40.84 |
| SH | 94.27 | 91.48 | 86.24 | 49.1  | 10.34 |
| TS | 94.68 | 92.44 | 90.04 | 83.28 | 58.65 |
| XB | 94.34 | 91.95 | 89.14 | 74.36 | 32.04 |
| XG | 94.18 | 91.38 | 86.19 | 46.81 | 8.32  |
| YC | 94.37 | 91.68 | 87.86 | 60.76 | 15.1  |
| YD | 96.68 | 93.8  | 89.3  | 67.36 | 21.96 |
| YS | 94.78 | 91.92 | 88.43 | 65.03 | 18.94 |
