# Supplementary material
Source: MDPI journal article supplement (https://www.mdpi.com/1999-4907/13/7/1100)
Supplement: s1 [file s1]

**Table S9. SNP and InDel number of 21 pinewood nematode samples.** SNP, single nucleotide polymorphism; InDel, Insertion and deletion.

| <b>Sample</b> | <b>SNP number</b> | <b>InDel number</b> |
|---------------|-------------------|---------------------|
| CW            | 301533            | 39209               |
| CY            | 356462            | 46805               |
| DT            | 356287            | 46554               |
| DY            | 442227            | 58618               |
| FC            | 300098            | 39015               |
| FS            | 356834            | 47095               |
| GJ            | 358124            | 47132               |
| HC            | 357873            | 47175               |
| HN            | 356613            | 46786               |
| HP            | 302092            | 39442               |
| LP            | 336836            | 43870               |
| LS            | 359116            | 47367               |
| LZ            | 355583            | 46735               |
| MP            | 358777            | 47540               |
| SH            | 355833            | 46745               |
| TS            | 358652            | 47286               |
| XB            | 357695            | 46978               |
| XG            | 355472            | 46466               |
| YC            | 356810            | 46838               |

|    |        |       |
|----|--------|-------|
| YD | 492996 | 63470 |
| YS | 360099 | 47512 |

**Table S10. Summary of SNP and InDel location.**

| Type                | Number | Percentage |
|---------------------|--------|------------|
| intronic            | 196728 | 29.63%     |
| intergenic          | 168376 | 25.36%     |
| exonic              | 161135 | 24.27%     |
| upstream            | 64008  | 9.64%      |
| downstream          | 47184  | 7.11%      |
| upstream;downstream | 26114  | 3.93%      |
| splicing            | 344    | 0.05%      |
| UTR5                | 1      | 0.00%      |

**Table S11. Summary of SNP and InDel function annotation.**

| Type                   | Number | Percentage |
|------------------------|--------|------------|
| synonymous SNV         | 126774 | 78.68%     |
| nonsynonymous SNV      | 32170  | 19.96%     |
| unknown                | 517    | 0.32%      |
| frameshift deletion    | 431    | 0.27%      |
| nonframeshift deletion | 411    | 0.26%      |
| frameshift insertion   | 282    | 0.18%      |

|                         |     |       |
|-------------------------|-----|-------|
| nonframeshift insertion | 262 | 0.16% |
| stopgain                | 217 | 0.13% |
| stoploss                | 71  | 0.04% |

**Table S12. Summary of transition and transversion.**

|                     |               |
|---------------------|---------------|
| <b>transition</b>   | <b>368837</b> |
| G->A                | 92430         |
| A->G                | 92364         |
| T->C                | 92115         |
| C->T                | 91928         |
| <b>transversion</b> | <b>218831</b> |
| T->A                | 28763         |
| A->T                | 28719         |
| G->T                | 28239         |
| C->A                | 27978         |
| T->G                | 27912         |
| A->C                | 27641         |
| C->G                | 25050         |
| G->C                | 24529         |
