# Supplementary material
Source: MDPI journal article supplement (https://www.mdpi.com/1999-4907/13/7/1100)
Supplement: s1 [file s1]

**Table S1. Survival rates of different isolates under low temperatures for 8 h and 24 h.**

| Isolates | Survival rates after 8 h exposure to cold |            | Survival rates after 24 h exposure to cold |            |
|----------|-------------------------------------------|------------|--------------------------------------------|------------|
|          | (mean± standard error)/%                  |            | (mean± standard error)/%                   |            |
|          | -5°C                                      | -10°C      | -5°C                                       | -10°C      |
| YD       | 93.47±4.76                                | 43.26±3.84 | 93.73±4.49                                 | 9.93±0.73  |
| YC       | 94.62±4.21                                | 44.55±2.73 | 92.99±4.10                                 | 10.02±0.79 |
| MP       | 94.77±2.48                                | 45.58±2.88 | 93.04±4.35                                 | 10.56±0.96 |
| XB       | 94.31±3.22                                | 43.32±1.07 | 94.78±3.86                                 | 10.54±1.03 |
| HN       | 93.62±3.98                                | 43.87±2.48 | 94.85±4.40                                 | 9.58±0.94  |

**Table S2. ANOVA tests statistic of survival rates of different strains under low temperatures for 8 h and 24 h.**

| Test                 | Degree of Freedom | F Statistic | P Value |
|----------------------|-------------------|-------------|---------|
| Group 1 <sup>a</sup> | 59                | 0.39        | 0.97    |
| Group 2 <sup>b</sup> | 59                | 1.00        | 0.44    |
| Group 3 <sup>c</sup> | 59                | 0.33        | 0.87    |
| Group 4 <sup>d</sup> | 59                | 0.78        | 0.55    |

<sup>a</sup> Survival rates of 5 isolates under -5°C for 8 h.

<sup>b</sup> Survival rates of 5 isolates under -10°C for 8 h.

<sup>c</sup> Survival rates of 5 isolates under -5°C for 24 h.

<sup>d</sup> Survival rates of 5 isolates under -10°C for 24 h.

**Table S3. Survival rates of different isolates after gradient cooling.**

| Minimum temperatures | Survival rates of mixed-stage nematodes |            | Survival rates of dispersal juveniles |            |
|----------------------|-----------------------------------------|------------|---------------------------------------|------------|
|                      | (mean± standard error)/%                |            | (mean± standard error)/%              |            |
|                      | YD                                      | XB         | YD                                    | XB         |
| -5°C                 | 97.84±1.58                              | 98.88±1.40 | 97.52±1.59                            | 97.59±1.07 |
| -7°C                 | 96.43±1.47                              | 97.60±1.75 | 97.51±1.18                            | 97.24±1.61 |
| -9°C                 | 92.87±3.02                              | 96.49±3.15 | 95.43±2.22                            | 93.89±1.92 |
| -11°C                | 97.02±3.09                              | 94.72±3.27 | 96.44±3.74                            | 93.73±3.45 |
| -13°C                | 93.13±3.28                              | 92.70±2.14 | 92.75±2.23                            | 92.32±3.40 |
| -15°C                | 92.54±3.98                              | 94.83±3.42 | 93.62±3.98                            | 92.42±2.33 |

**Table S4. ANOVA tests statistic of survival rates of different strains after gradient cooling.**

| <b>Test</b>          | <b>Degree of Freedom</b> | <b><i>F</i> Statistic</b> | <b><i>P</i> Value</b> |
|----------------------|--------------------------|---------------------------|-----------------------|
| Group 1 <sup>a</sup> | 71                       | 1.74                      | 0.17                  |
| Group 2 <sup>b</sup> | 71                       | 1.24                      | 0.33                  |
| Group 3 <sup>c</sup> | 71                       | 1.74                      | 0.17                  |
| Group 4 <sup>d</sup> | 71                       | 2.01                      | 0.13                  |

<sup>a</sup> Survival rates of YD isolate mixed-stage nematodes after gradient cooling.

<sup>b</sup> Survival rates of XB isolate mixed-stage nematodes after gradient cooling.

<sup>c</sup> Survival rates of YD isolate dispersal juveniles after gradient cooling.

<sup>d</sup> Survival rates of XB isolate dispersal juveniles after gradient cooling.
