# Supplementary material
Source: MDPI journal article supplement (https://www.mdpi.com/1999-4907/13/7/1100)

**Figure S1. Morphological characteristics of the third-stage dispersal juveniles of pinewood nematode.** (a) Whole body of the third-stage dispersal juveniles of pinewood nematode; (b) head of the third-stage dispersal juveniles of pinewood nematode; (c) tail of the third-stage dispersal juveniles of pinewood nematode.

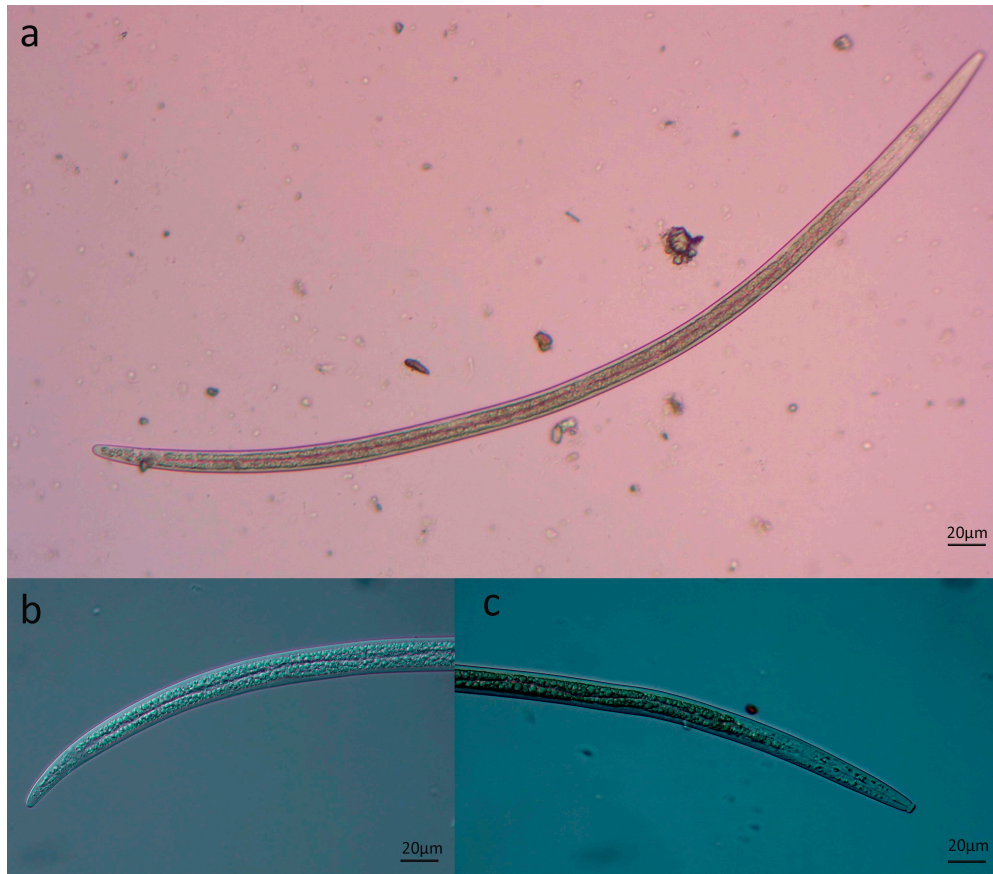

**Figure S2. Morphological characteristics of the third-stage propagative juveniles of pinewood nematode.** (a) Whole body of the third-stage propagative juveniles of pinewood nematode; (b) head of the third-stage propagative juveniles of pinewood nematode; (c) tail of the third-stage propagative juveniles of pinewood nematode.

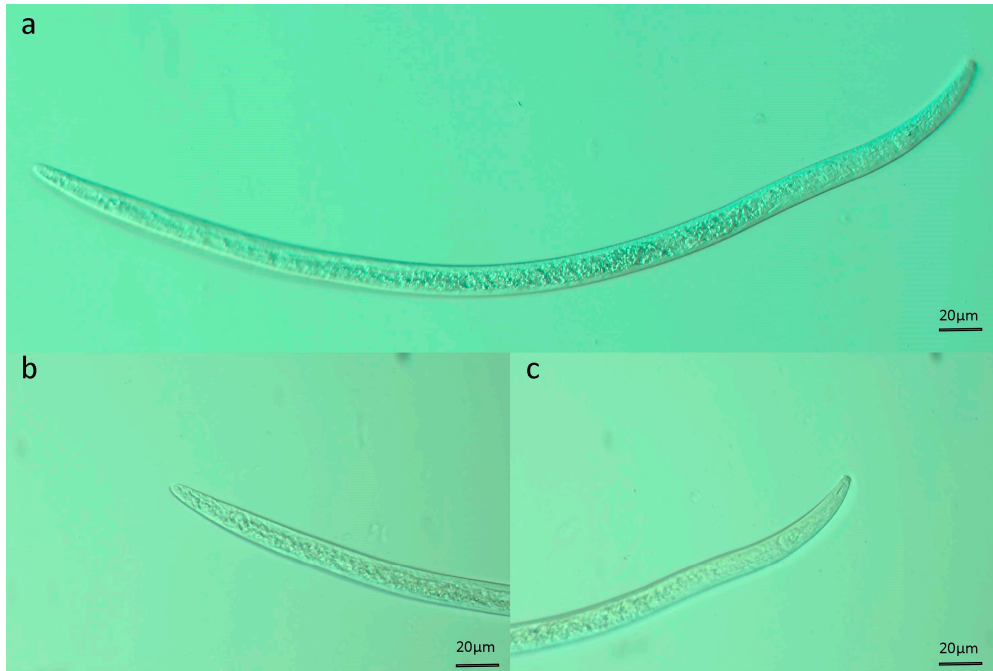

Supplement: s1 [file s1]
