# Supplementary material
Source: MDPI journal article supplement (https://www.mdpi.com/1999-4907/13/7/1100)
Supplement: s1 [file s1]

**Table S13. SNP location summary of 21 pinewood nematode samples.**

| <b>Sample</b> | <b>downstream</b> | <b>exonic</b> | <b>intergenic</b> | <b>intronic</b> | <b>splicing</b> | <b>upstream</b> |
|---------------|-------------------|---------------|-------------------|-----------------|-----------------|-----------------|
| CW            | 20037             | 80912         | 78344             | 84077           | 114             | 27447           |
| CY            | 24036             | 98172         | 87775             | 100133          | 130             | 33382           |
| DT            | 24051             | 98135         | 87716             | 100082          | 131             | 33394           |
| DY            | 29552             | 119698        | 112363            | 123540          | 163             | 40966           |
| FC            | 19989             | 81094         | 77759             | 83289           | 116             | 27286           |
| FS            | 24137             | 98434         | 87701             | 100147          | 132             | 33422           |
| GJ            | 24196             | 98273         | 88301             | 100763          | 133             | 33561           |
| HC            | 24206             | 98221         | 88174             | 100735          | 131             | 33532           |
| HN            | 24084             | 98146         | 87785             | 100225          | 130             | 33403           |
| HP            | 20099             | 81013         | 78545             | 84192           | 115             | 27509           |
| LP            | 22325             | 91254         | 86301             | 94116           | 130             | 30580           |
| LS            | 24158             | 98489         | 88657             | 101229          | 131             | 33544           |
| LZ            | 24018             | 98065         | 87429             | 99839           | 132             | 33302           |
| MP            | 24272             | 98521         | 88421             | 100916          | 135             | 33582           |
| SH            | 24009             | 98096         | 87543             | 99972           | 132             | 33323           |
| TS            | 24302             | 98260         | 88431             | 101028          | 131             | 33578           |
| XB            | 24150             | 98207         | 88099             | 100733          | 130             | 33505           |
| XG            | 23966             | 98119         | 87386             | 99760           | 132             | 33301           |
| YC            | 24085             | 98207         | 87825             | 100282          | 130             | 33452           |
| YD            | 32897             | 138149        | 118516            | 138626          | 192             | 45869           |

|    |       |       |       |        |     |       |
|----|-------|-------|-------|--------|-----|-------|
| YS | 24197 | 98860 | 89061 | 101333 | 131 | 33593 |
|----|-------|-------|-------|--------|-----|-------|

**Table S14. SNP function summary of 21 pinewood nematode samples.**

| Sample | nonsynonymous | stopgain | stoploss | synonymous | unknown |
|--------|---------------|----------|----------|------------|---------|
| CW     | 15414         | 88       | 29       | 65087      | 294     |
| CY     | 19830         | 116      | 34       | 77837      | 355     |
| DT     | 19826         | 108      | 33       | 77813      | 355     |
| DY     | 23549         | 135      | 42       | 95593      | 379     |
| FC     | 15457         | 89       | 29       | 65227      | 292     |
| FS     | 19855         | 111      | 34       | 78083      | 351     |
| GJ     | 19872         | 115      | 34       | 77897      | 355     |
| HC     | 19845         | 108      | 34       | 77879      | 355     |
| HN     | 19827         | 110      | 34       | 77820      | 355     |
| HP     | 15431         | 91       | 29       | 65169      | 293     |
| LP     | 17731         | 99       | 31       | 73029      | 364     |
| LS     | 19927         | 114      | 36       | 78057      | 355     |
| LZ     | 19792         | 110      | 34       | 77774      | 355     |
| MP     | 19899         | 112      | 36       | 78118      | 356     |
| SH     | 19807         | 112      | 33       | 77789      | 355     |
| TS     | 19872         | 111      | 34       | 77888      | 355     |
| XB     | 19831         | 110      | 35       | 77876      | 355     |
| XG     | 19814         | 108      | 34       | 77808      | 355     |

|    |       |     |    |        |     |
|----|-------|-----|----|--------|-----|
| YC | 19842 | 107 | 34 | 77869  | 355 |
| YD | 27116 | 141 | 50 | 110385 | 457 |
| YS | 20012 | 112 | 34 | 78346  | 356 |

**Table S15. SNP transition and transversion summary of 21 pinewood nematode samples.**

| Sample | transition | transversion | ts/tv  |
|--------|------------|--------------|--------|
| CW     | 189627     | 111906       | 1.6945 |
| CY     | 224495     | 131967       | 1.7011 |
| DT     | 224459     | 131828       | 1.7027 |
| DY     | 278067     | 164160       | 1.6939 |
| FC     | 188901     | 111197       | 1.6988 |
| FS     | 224782     | 132052       | 1.7022 |
| GJ     | 225513     | 132611       | 1.7006 |
| HC     | 225252     | 132621       | 1.6985 |
| HN     | 224580     | 132033       | 1.7009 |
| HP     | 189975     | 112117       | 1.6944 |
| LP     | 211731     | 125105       | 1.6924 |
| LS     | 226059     | 133057       | 1.699  |
| LZ     | 223990     | 131593       | 1.7021 |
| MP     | 225784     | 132993       | 1.6977 |
| SH     | 224064     | 131769       | 1.7004 |
| TS     | 225805     | 132847       | 1.6997 |

|    |        |        |        |
|----|--------|--------|--------|
| XB | 225219 | 132476 | 1.7001 |
| XG | 223948 | 131524 | 1.7027 |
| YC | 224663 | 132147 | 1.7001 |
| YD | 310429 | 182567 | 1.7004 |
| YS | 226645 | 133454 | 1.6983 |

**Table S16. SNP homozygosity and heterozygosity summary of 21 pinewood nematode samples.**

| Sample | Homozygosity | Heterozygosity |
|--------|--------------|----------------|
| CW     | 289451       | 12082          |
| CY     | 344102       | 12360          |
| DT     | 343928       | 12359          |
| DY     | 213182       | 229045         |
| FC     | 286700       | 13398          |
| FS     | 339161       | 17673          |
| GJ     | 345414       | 12710          |
| HC     | 345162       | 12711          |
| HN     | 344231       | 12382          |
| HP     | 289539       | 12553          |
| LP     | 266903       | 69933          |
| LS     | 346286       | 12830          |
| LZ     | 342483       | 13100          |
| MP     | 342826       | 15951          |

---

|    |        |        |
|----|--------|--------|
| SH | 343331 | 12502  |
| TS | 346273 | 12379  |
| XB | 345655 | 12040  |
| XG | 343510 | 11962  |
| YC | 344578 | 12232  |
| YD | 244605 | 248391 |
| YS | 342476 | 17623  |

---
